# Supplementary material for: Graphene aerogel prepared by thermal evaporation of graphene oxide suspension containing sodium bicarbonate
Source: Royal Society of Chemistry journal article supplement (doi:10.1039/c5ta01222h), 2015-01-01
Supplement: c5ta01222h1.pdf [file c5ta01222h1.pdf]

## Supplementary Information for

# Graphene Aerogel Prepared by Thermal Evaporation of Graphene Oxide Suspension Containing Sodium Bicarbonate

Shaolin Yang,<sup>ab</sup> Li Zhang,<sup>a</sup> Qiuyun Yang,<sup>a</sup> Zihan Zhang,<sup>a</sup> Bo Chen,<sup>a</sup> Peng Lv,<sup>a</sup> Wei Zhu\*<sup>a</sup> and Guanzhong Wang\*<sup>a</sup>

<sup>a</sup>Hefei National Laboratory for Physical Sciences at Microscale, and Department of Physics, University of Science and Technology of China, Hefei, Anhui, 230026, P. R. China. E-mail: [zhuw@ustc.edu.cn](mailto:zhuw@ustc.edu.cn) (W. Zhu), [gzwang@ustc.edu.cn](mailto:gzwang@ustc.edu.cn) (G. Wang). Tel.: +86 551 63603323; fax: +86 551 63606266

<sup>b</sup>School of Material Science and Engineering, North University of Nationalities, Yinchuan, Ningxia, 750021, P. R. China

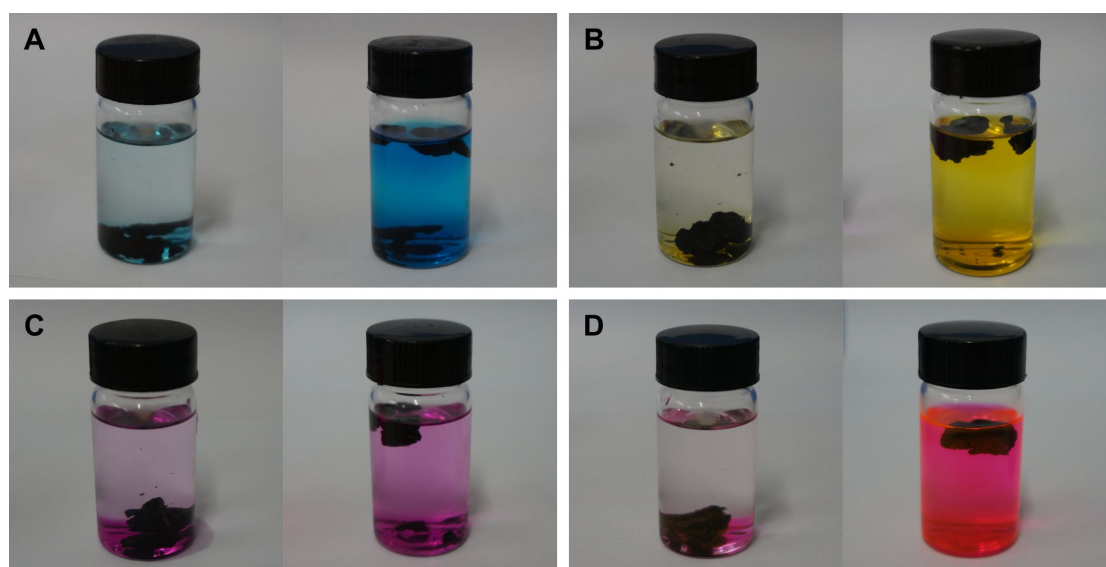

**Fig. S1** Photographs of MB (A), MO (B), AF (C) and RB (D) adsorbed G-Gels after they were immersed in ethanol for 1 minute (left) and 1 hour (right).

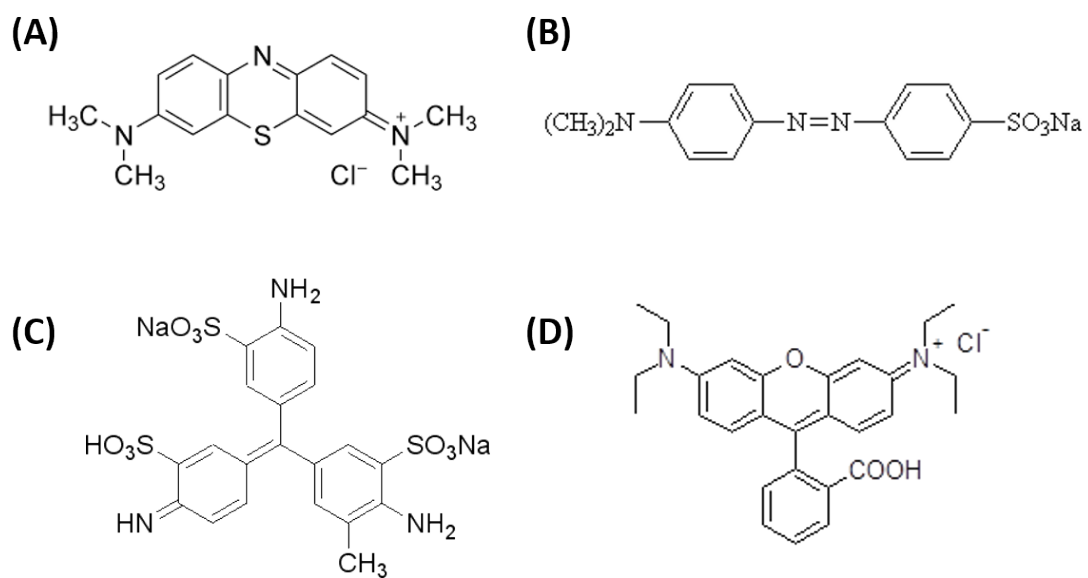

**Fig. S2** The chemical structure of (A) MB, (B) MO, (C) AF and (D) RB.

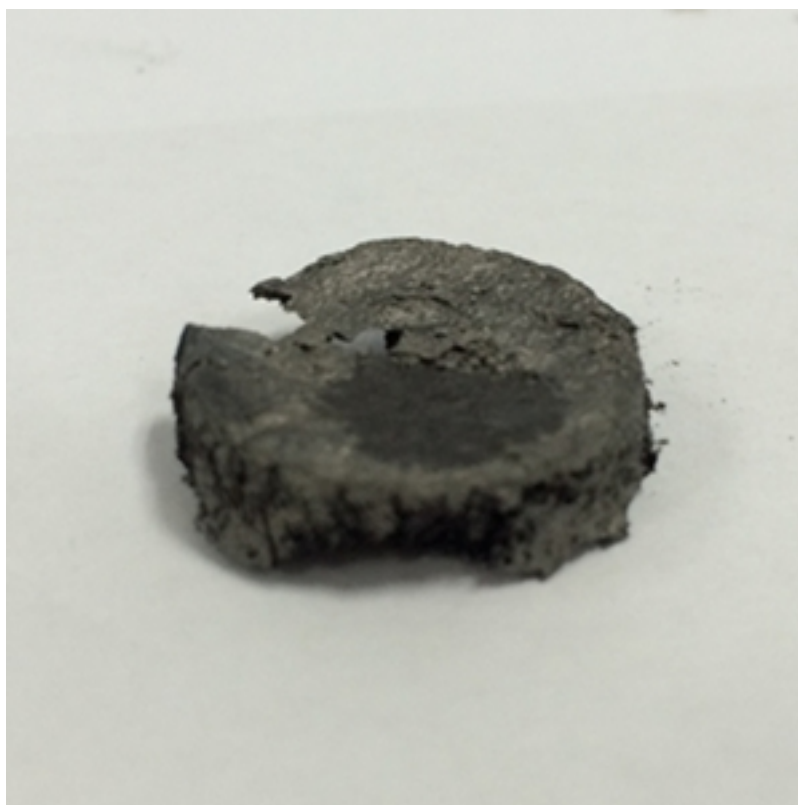

**Fig. S3** Photograph of oil dripped on TG-Gel.
